# Supplementary material for: Power Load Prediction Based on Fractal Theory
Source: Hindawi journal article supplement (doi:10.1155/2015/827238), 2015-01-01
Supplement: f1 [file 827238.f1.docx]

In this paper, we apply the fractal theory to predict the power load. According to the fractal interpolation method, we can calculate the affine coefficients of IFS, as shown in Table1.1.

According to load data July 8, 15, 21 in theTable1.2, fractal interpolation parameters of three similar days were calculated, we weight and average them to obtain IFS codes by the fractal interpolation. Then by benchmark interpolating points, we use the deterministic algorithm to get attractor, which can be considered as the prediction daily load curve fit by the historical data.

Using fractal interpolation function and improved deterministic iterative attractor algorithms, we can accurately predict the electric power load from the result.

Table 1.1 IFS codes of fractal interpolation

| Coefficient | a | c | d | e | f |
| --- | --- | --- | --- | --- | --- |
| 1 | 0.0213 | -0.5357 | -0.0698 | 0.4894 | 474.0602 |
| 2 | 0.0213 | -0.3673 | -0.0534 | 0.9894 | 453.7342 |
| 3 | 0.0213 | -0.1882 | -0.0274 | 1.4894 | 432.0924 |
| 4 | 0.0213 | -0.4455 | -0.0646 | 1.9894 | 444.5385 |
| 5 | 0.0213 | 0.0029 | -0.0003 | 2.4894 | 403.6593 |
| 6 | 0.0213 | -0.7698 | -0.1085 | 2.9894 | 453.3236 |
| 7 | 0.0213 | 0.2650 | 0.0375 | 3.4894 | 366.3361 |
| 8 | 0.0213 | 0.2286 | 0.0344 | 3.9894 | 376.0253 |
| 9 | 0.0213 | 0.5837 | 0.0832 | 4.4894 | 359.7458 |
| 10 | 0.0213 | -0.1254 | -0.0199 | 4.9894 | 420.9114 |
| 11 | 0.0213 | 0.9604 | 0.1403 | 5.4894 | 346.4575 |
| 12 | 0.0213 | 0.6629 | 0.0893 | 5.9894 | 394.8628 |
| 13 | 0.0213 | 1.3693 | 0.1894 | 6.4894 | 364.2898 |
| 14 | 0.0213 | 0.9708 | 0.1426 | 6.9894 | 419.1270 |
| 15 | 0.0213 | 0.4246 | 0.0648 | 7.4894 | 481.0946 |
| 16 | 0.0213 | 0.2279 | 0.0282 | 7.9894 | 508.1429 |
| 17 | 0.0213 | 0.6179 | 0.0860 | 8.4894 | 485.8020 |
| 18 | 0.0213 | 0.2819 | 0.0430 | 8.9894 | 521.3269 |
| 19 | 0.0213 | 0.2887 | 0.0437 | 9.4894 | 530.2681 |
| 20 | 0.0213 | -0.4569 | -0.0684 | 9.9894 | 586.8292 |
| 21 | 0.0213 | -0.4569 | -0.0164 | 10.4894 | 550.8502 |
| 22 | 0.0213 | -0.0916 | 0.0337 | 10.9894 | 526.3000 |
| 23 | 0.0213 | 0.2249 | -0.0146 | 11.4894 | 554.1047 |
| 24 | 0.0213 | -0.1003 | -0.0236 | 11.9894 | 555.2405 |
| 25 | 0.0213 | -0.1626 | 0.0113 | 12.4894 | 535.5617 |
| 26 | 0.0213 | 0.0359 | -0.0208 | 12.9894 | 552.4121 |
| 27 | 0.0213 | -0.1296 | -0.0741 | 13.4894 | 571.5592 |
| 28 | 0.0213 | -0.5268 | -0.0408 | 13.9894 | 543.5485 |
| 29 | 0.0213 | 0.5590 | 0.0854 | 14.4894 | 480.3655 |
| 30 | 0.0213 | -0.6247 | -0.0946 | 14.9894 | 576.3811 |
| 31 | 0.0213 | -0.4455 | -0.0628 | 15.4894 | 544.4028 |
| 32 | 0.0213 | -0.1486 | -0.0163 | 15.9894 | 513.0590 |
| 33 | 0.0213 | -0.1939 | -0.0324 | 16.4894 | 515.8586 |
| 34 | 0.0213 | -0.3658 | -0.0508 | 16.9894 | 520.1136 |
| 35 | 0.0213 | -0.2048 | -0.0289 | 17.4894 | 500.6746 |
| 36 | 0.0213 | -0.3197 | -0.0467 | 17.9894 | 502.3629 |
| 37 | 0.0213 | 0.5960 | 0.0876 | 18.4894 | 435.4319 |
| 38 | 0.0213 | 0.1011 | 0.0117 | 18.9894 | 485.1653 |
| 39 | 0.0213 | 0.7565 | 0.1064 | 19.4894 | 443.3976 |
| 40 | 0.0213 | 1.0475 | 0.1584 | 19.9894 | 440.8573 |
| 41 | 0.0213 | -0.2615 | -0.0414 | 20.4894 | 557.7526 |
| 42 | 0.0213 | -0.2149 | -0.0315 | 20.9894 | 545.6839 |
| 43 | 0.0213 | -0.5063 | -0.0723 | 21.4894 | 558.8618 |
| 44 | 0.0213 | -0.2883 | -0.0414 | 21.9894 | 531.6660 |
| 45 | 0.0213 | -0.1708 | -0.0240 | 22.4894 | 515.9781 |
| 46 | 0.0213 | -1.1593 | -0.1655 | 22.9894 | 575.4655 |
| 47 | 0.0213 | -0.6391 | -0.0880 | 23.4894 | 510.9573 |

Table 1.2

| Date | July 8 | July 15 | July 21 |
| --- | --- | --- | --- |
| 00:30 | 417 | 450 | 445 |
| 01:00 | 422 | 440 | 407 |
| 01:30 | 415 | 440 | 391 |
| 02:00 | 401 | 426 | 398 |
| 02:30 | 398 | 409 | 394 |
| 03:00 | 391 | 411 | 395 |
| 03:30 | 402 | 380 | 379 |
| 04:00 | 379 | 410 | 378 |
| 04:30 | 393 | 405 | 378 |
| 05:00 | 398 | 443 | 375 |
| 05:30 | 391 | 419 | 395 |
| 06:00 | 428 | 444 | 408 |
| 06:30 | 468 | 441 | 456 |
| 07:00 | 481 | 475 | 511 |
| 07:30 | 491 | 514 | 512 |
| 08:00 | 530 | 520 | 512 |
| 08:30 | 540 | 516 | 539 |
| 09:00 | 522 | 543 | 554 |
| 09:30 | 502 | 560 | 545 |
| 10:00 | 553 | 549 | 549 |
| 10:30 | 538 | 544 | 551 |
| 11:00 | 517 | 544 | 558 |
| 11:30 | 506 | 553 | 556 |
| 12:00 | 510 | 548 | 556 |
| 12:30 | 518 | 544 | 553 |
| 13:00 | 524 | 554 | 527 |
| 13:30 | 533 | 541 | 538 |
| 14:00 | 514 | 532 | 518 |
| 14:30 | 486 | 522 | 527 |
| 15:00 | 519 | 544 | 517 |
| 15:30 | 514 | 513 | 530 |
| 16:00 | 498 | 505 | 514 |
| 16:30 | 508 | 504 | 492 |
| 17:00 | 475 | 503 | 500 |
| 17:30 | 484 | 488 | 490 |
| 18:00 | 484 | 481 | 485 |
| 18:30 | 453 | 481 | 475 |
| 19:00 | 477 | 497 | 481 |
| 19:30 | 492 | 489 | 500 |
| 20:00 | 486 | 517 | 518 |
| 20:30 | 531 | 552 | 509 |
| 21:00 | 524 | 538 | 521 |
| 21:30 | 514 | 533 | 518 |
| 22:00 | 512 | 515 | 509 |
| 22:30 | 505 | 507 | 503 |
| 23:00 | 488 | 509 | 493 |
| 23:30 | 461 | 478 | 465 |
| 24:00 | 440 | 486 | 433 |
